# Supplementary material
Source: PubMed Central journal article supplement (PMC3235793)
Supplement: NIHMS330604-supplement-01.pdf [file NIHMS330604-supplement-01.pdf]

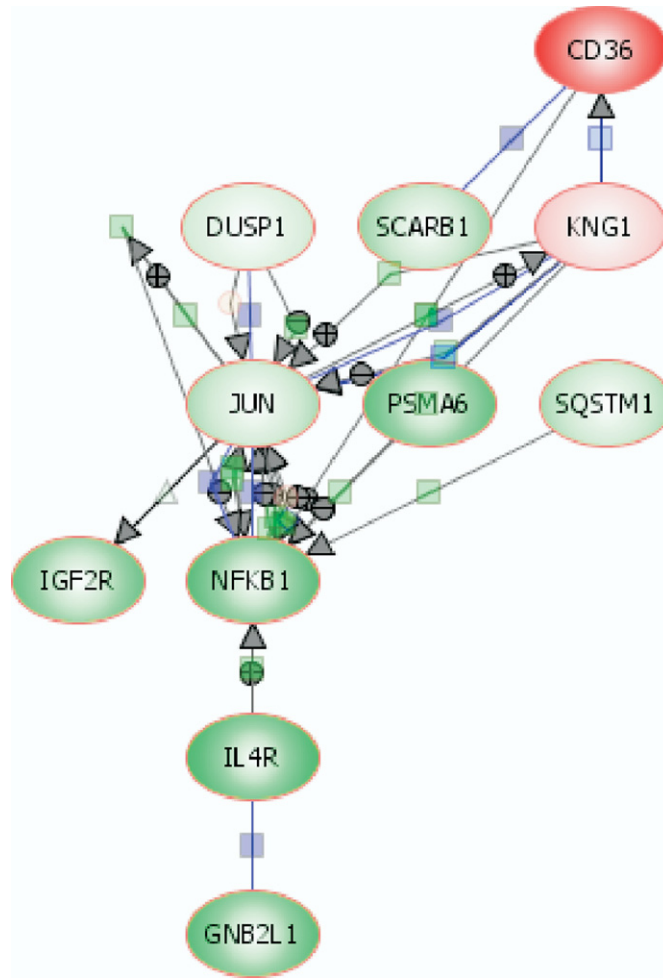

**FIG. S1.** Direct interaction network of significantly altered genes on day 2 after burn injury.

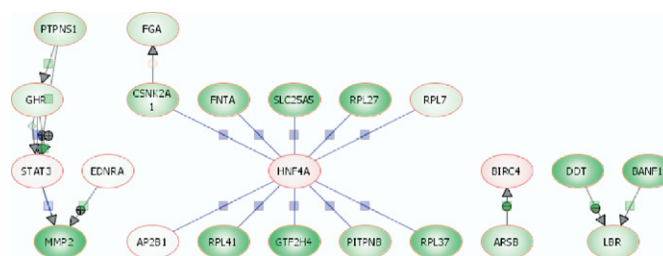

**FIG. S2.** Direct interaction network of significantly altered genes on day 7 after burn injury.

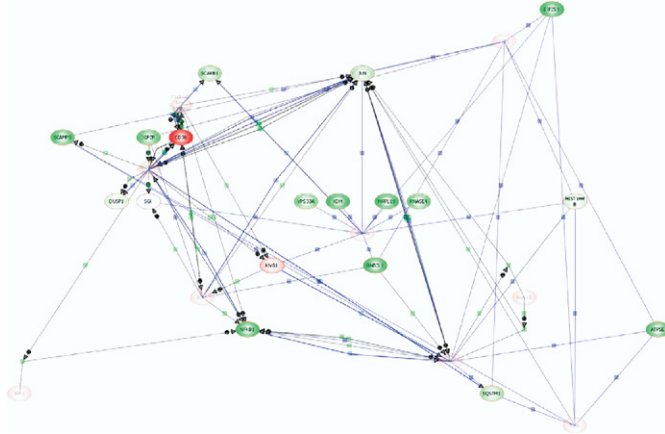

**FIG. S3.** Relevance network of significantly altered genes on day 2 after burn injury.

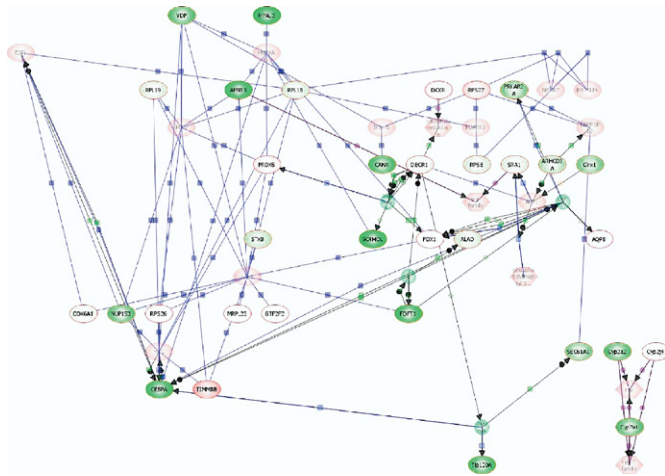

**FIG. S4.** Relevance network of significantly altered genes on day 4 after burn injury.

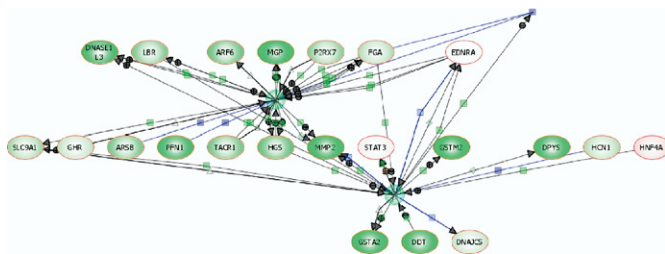

**FIG. S5.** Relevance network of significantly altered genes on day 7 after burn injury.
